# Supplementary material for: Key to intimately coupling metal chalcogenides with a carbon nanonetwork for potassium-ion storage
Source: Royal Society of Chemistry journal article supplement (doi:10.1039/d2ta00269h), 2022-01-01
Supplement: d2ta00269h1.pdf [file d2ta00269h1.pdf]

## Supplementary Materials

### Keys to Intimately Coupling Metal Chalcogenides with Carbon Nanonetwork for Potassium-Ion Storage

Weicai Zhang, Zhuohao Xie, Chaowen Lan, Yinghan Yang, Mingtao Zheng, Hang  
Hu, Yong Xiao, Yingliang Liu\*, Yeru Liang \*

Correspondence to: [tliuyl@scau.edu.cn](mailto:tliuyl@scau.edu.cn), [liangyr@scau.edu.cn](mailto:liangyr@scau.edu.cn)

## Supplementary Figures

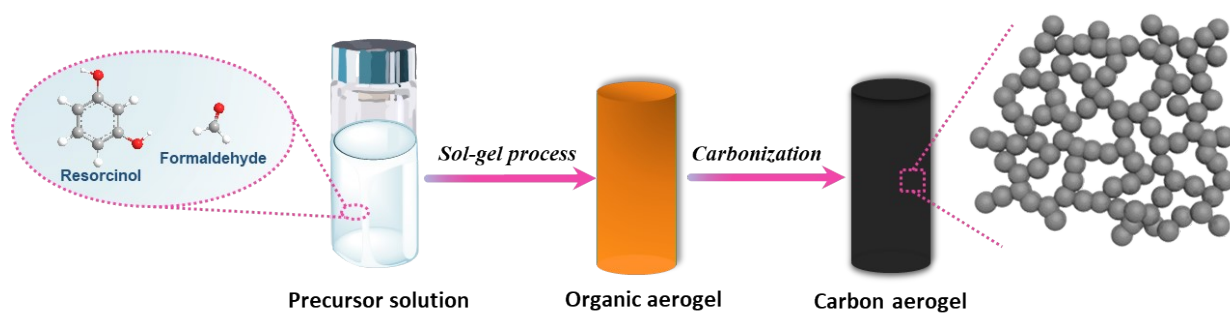

**Figure S1.** Schematic illustration for preparing CA.

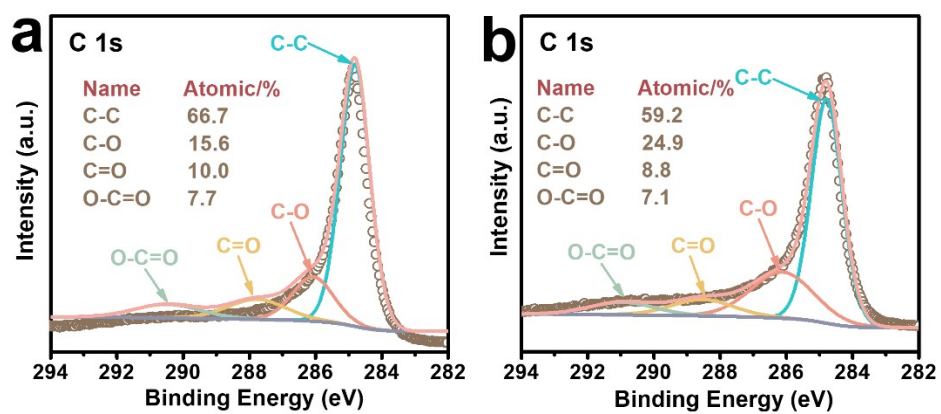

**Figure S2.** XPS spectra of C 1s spectrums in (a) CA and (b) O-CA.

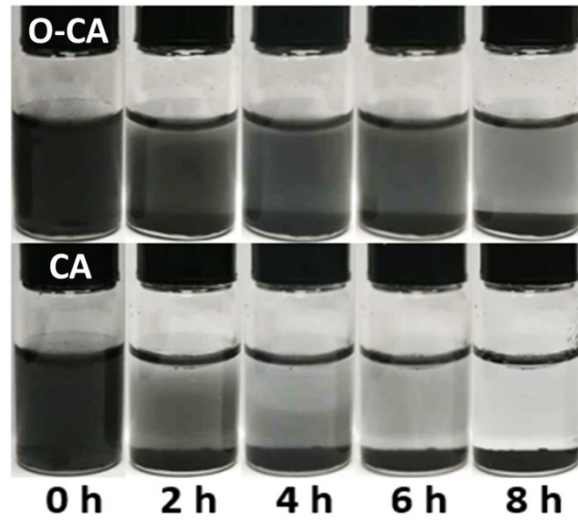

Figure S3. Digital photographs of CA and O-CA dispersed in deionized water.

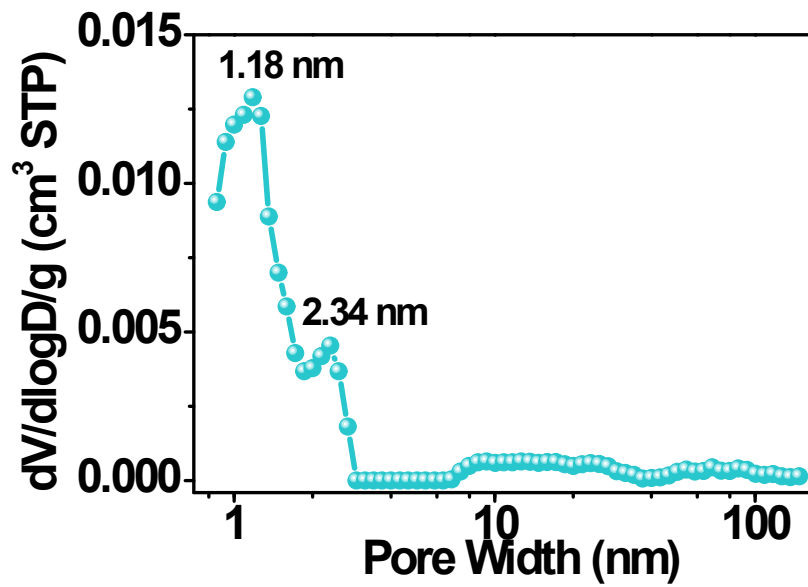

Figure S4. The pore size distribution of CA@MoSe<sub>2</sub>.

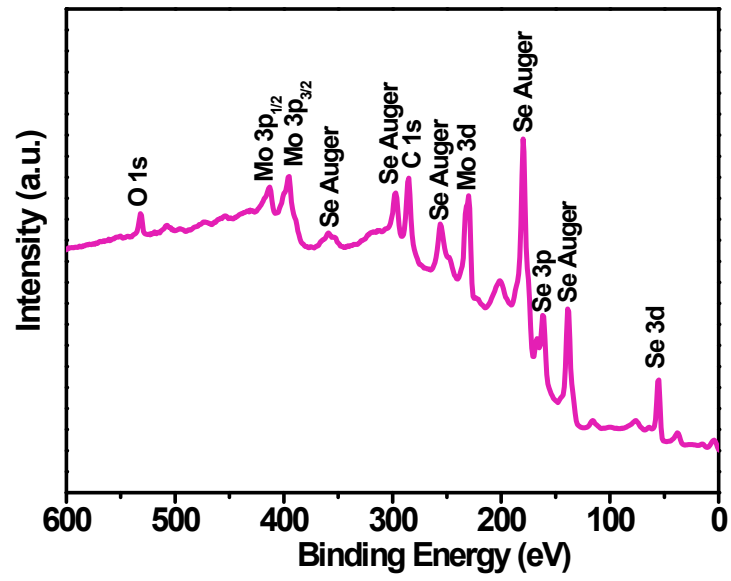

Figure S5. The XPS survey spectrum of CA@MoSe<sub>2</sub>.

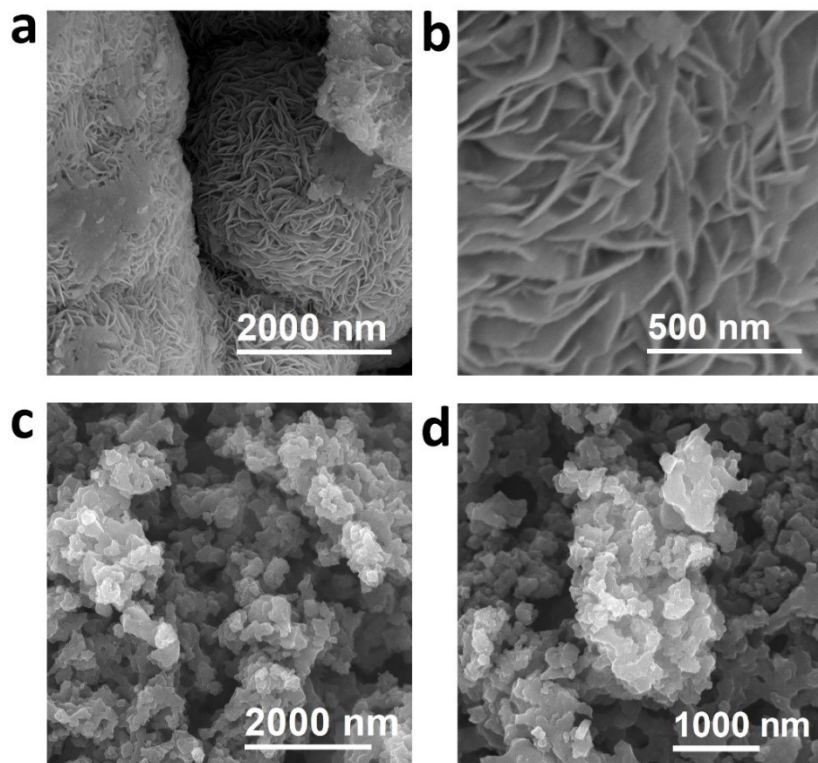

Figure S6. SEM images of (a, b) MoS<sub>2</sub> and (c, d) CA/MoS<sub>2</sub>.

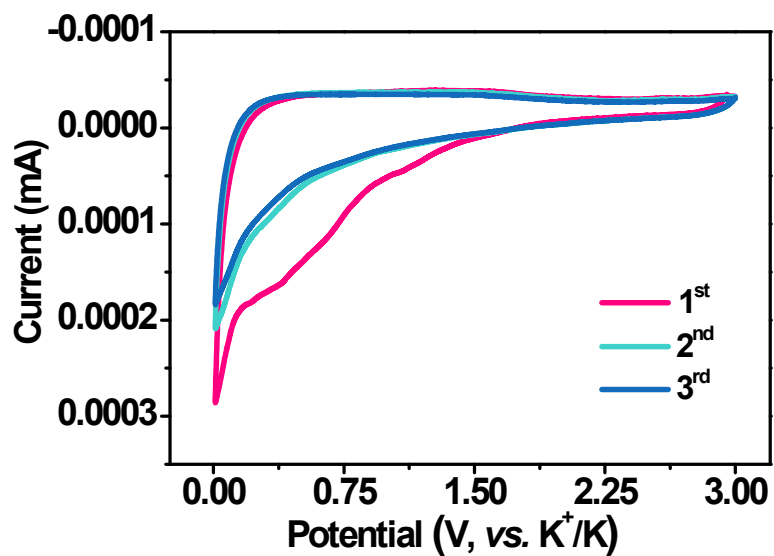

**Figure S7.** CV curves of CA@MoS<sub>2</sub> anode cycled at the 1<sup>st</sup>, 2<sup>nd</sup>, and 3<sup>rd</sup> between 0.01 and 3 V (vs. K<sup>+</sup>/K) at a scan rate of 0.1 mV s<sup>-1</sup>.

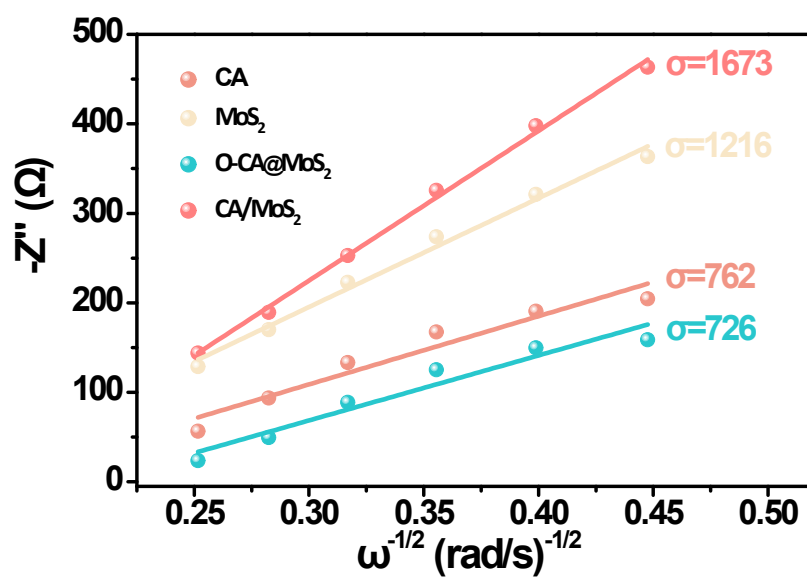

**Figure S8.** Plots of  $\omega^{-1/2}$  versus  $-Z''$  of different anodes in KIBs.

## Supplementary Tables

**Table S1.** Chemical structure of CA and O-CA characterized by XPS.

| <b>Sample</b> | <b>C 1s (at. %)</b> | <b>O 1s (at. %)</b> | <b>C/O ratio (at. %)</b> |
|---------------|---------------------|---------------------|--------------------------|
| CA            | 95.2                | 3.4                 | 28.0                     |
| O-CA          | 92.8                | 5.7                 | 16.3                     |

**Table S2.** Binding energy and net electron transfer of graphene-Mo and graphene oxide-Mo.

| <b>Systems</b>     | <b><math>E_{\text{total}}</math> (eV)</b> | <b><math>E_{\text{substrate}}</math> (eV)</b> | <b><math>E_{\text{Mo}}</math> (eV)</b> | <b><math>E_{\text{b}}</math> (eV)</b> | <b><math>\Delta q</math> (e)</b> |
|--------------------|-------------------------------------------|-----------------------------------------------|----------------------------------------|---------------------------------------|----------------------------------|
| Carbon-Mo          | -465.78                                   | -461.07                                       | -0.43                                  | -4.28                                 | 0.38                             |
| Oxidized carbon-Mo | -583.00                                   | -575.64                                       | -0.43                                  | -6.93                                 | 1.02                             |

**Table S3.** Comparisons of the discharge capacity of different anodes for KIBs.

| <b>Anodes</b>                                       | <b>Current density (mA g<sup>-1</sup>)</b> | <b>Discharge capacity (mAh g<sup>-1</sup>)</b> | <b>References</b> |
|-----------------------------------------------------|--------------------------------------------|------------------------------------------------|-------------------|
| Mesoporous carbon                                   | 50                                         | 286                                            | [1]               |
| Graphitic carbon nanocage                           | 14                                         | 137                                            | [2]               |
| Porous hard carbon microspheres                     | 50                                         | 227                                            | [3]               |
| CoS@graphene                                        | 50                                         | 311                                            | [4]               |
| CoS/N-doped carbon                                  | 200                                        | 303                                            | [5]               |
| Fe-Mo selenide@N-doped carbon                       | 200                                        | 298                                            | [6]               |
| Iron sulfide/carbon hybrid cluster                  | 100                                        | 226                                            | [7]               |
| FeCl <sub>3</sub> -intercalated expanded graphite   | 50                                         | 270                                            | [8]               |
| FeS <sub>2</sub> @rGO                               | 50                                         | 264                                            | [9]               |
| Sandwich-like MoS <sub>2</sub> @SnO <sub>2</sub> @C | 50                                         | 312                                            | [10]              |
| P@nanotube-backboned mesoporous carbon              | 50                                         | 244                                            | [11]              |
| Phosphorus/carbon composite                         | 50                                         | 324                                            | [12]              |
| ReS <sub>2</sub> /N-doped carbon                    | 50                                         | 253                                            | [13]              |
| Sb@N, P co-doped mesoporous carbon                  | 50                                         | 266                                            | [14]              |
| 3D hierarchically porous carbon/Sn                  | 50                                         | 276                                            | [15]              |
| KTi <sub>2</sub> (PO <sub>4</sub> ) <sub>3</sub> @C | 20                                         | 293                                            | [16]              |
| Metal-organic framework-MIL-125 (Ti)                | 10                                         | 208                                            | [17]              |
| Sn-interspersed MoS <sub>2</sub> /C nanosheets      | 100                                        | 290                                            | [18]              |
| MoSe <sub>2</sub> /N-Doped Carbon                   | 100                                        | 258                                            | [19]              |
| Pistachio-shuck-like MoSe <sub>2</sub> /C           | 200                                        | 322                                            | [20]              |
| <b>CA@MoS<sub>2</sub></b>                           | <b>100</b>                                 | <b>389</b>                                     | <b>This work</b>  |



**Table S4.** The kinetic parameters of different anodes.

| <b>Parameters</b>                                      | <b>CA@MoS<sub>2</sub></b> | <b>CA</b> | <b>CA/MoS<sub>2</sub></b> | <b>MoS<sub>2</sub></b> |
|--------------------------------------------------------|---------------------------|-----------|---------------------------|------------------------|
| R <sub>s</sub> (Ω)                                     | 2.3                       | 3.6       | 4.0                       | 30.5                   |
| R <sub>ct</sub> (Ω)                                    | 1619.1                    | 1287.4    | 1923.0                    | 1740.5                 |
| σ (Ω Hz <sup>1/2</sup> )                               | 726.3                     | 762.3     | 1673.1                    | 1215.9                 |
| D (10 <sup>-20</sup> cm <sup>2</sup> s <sup>-1</sup> ) | 8.1                       | 7.4       | 1.5                       | 2.9                    |

## Supplementary References

- [1] W. Wang, J. Zhou, Z. Wang, L. Zhao, P. Li, Y. Yang, C. Yang, H. Huang, S. Guo, *Adv. Energy Mater.* **2018**, *8*, 1701648.
- [2] B. Cao, Q. Zhang, H. Liu, B. Xu, S. Zhang, T. Zhou, J. Mao, W. K. Pang, Z. Guo, A. Li, J. Zhou, X. Chen, H. Song, *Adv. Energy Mater.* **2018**, *8*, 1801149.
- [3] M. Chen, W. Wang, X. Liang, S. Gong, J. Liu, Q. Wang, S. Guo, H. Yang, *Adv. Energy Mater.* **2018**, *8*, 1800171.
- [4] H. Gao, T. Zhou, Y. Zheng, Q. Zhang, Y. Liu, J. Chen, H. Liu, Z. Guo, *Adv. Funct. Mater.* **2017**, *27*, 1702634.
- [5] Q. Yu, J. Hu, C. Qian, Y. Gao, W. Wang, G. Yin, *J. Solid State Electr.* **2019**, *23*, 27.
- [6] J. Chu, Q. Yu, D. Yang, L. Xing, C.-Y. Lao, M. Wang, K. Han, Z. Liu, L. Zhang, W. Du, K. Xi, Y. Bao, W. Wang, *Appl. Mater. Today* **2018**, *13*, 344.
- [7] Q. Yu, J. Hu, Y. Gao, J. Gao, G. Suo, P. Zuo, W. Wang, G. Yin, *J. Alloy. Compd.* **2018**, *766*, 1086.
- [8] D. Li, M. Zhu, L. Chen, L. Chen, W. Zhai, Q. Ai, G. Hou, Q. Sun, Y. Liu, Z. Liang, S. Guo, J. Lou, P. Si, J. Feng, L. Zhang, L. Ci, *Adv. Mater. Interfaces* **2018**, *5*, 1800606.
- [9] J. Xie, Y. Zhu, N. Zhuang, H. Lei, W. Zhu, Y. Fu, M. S. Javed, J. Li, W. Mai, *Nanoscale* **2018**, *10*, 17092.
- [10] Z. Chen, D. Yin, M. Zhang, *Small* **2018**, *14*, 1703818.
- [11] D. Liu, X. Huang, D. Qu, D. Zheng, G. Wang, J. Harris, J. Si, T. Ding, J. Chen, D. Qu, *Nano Energy* **2018**, *52*, 1.
- [12] X. Wu, W. Zhao, H. Wang, X. Qi, Z. Xing, Q. Zhuang, Z. Ju, *J. Power Sources* **2018**, *378*, 460.
- [13] M. Mao, C. Cui, M. Wu, M. Zhang, T. Gao, X. Fan, J. Chen, T. Wang, J. Ma, C. Wang, *Nano Energy* **2018**, *45*, 346.
- [14] W. Zhang, W. Miao, X. Liu, L. Li, Z. Yu, Q. Zhang, *J. Alloy. Compd.* **2018**, *769*, 141.

- [15]K. Huang, Z. Xing, L. Wang, X. Wu, W. Zhao, X. Qi, H. Wang, Z. Ju, *J. Mater. Chem. A* **2018**, *6*, 434.
- [16]Z. Wei, D. Wang, M. Li, Y. Gao, C. Wang, G. Chen, F. Du, *Adv. Energy Mater.* **2018**, *8*, 1801102.
- [17]Y. An, H. Fei, Z. Zhang, L. Ci, S. Xiong, J. Feng, *Chem. Commun.* **2017**, *53*, 8360.
- [18]D. Yin, Z. Chen, M. Zhang, *J. Phys. Chem. Solids* **2019**, *126*, 72.
- [19]J. Ge, L. Fan, J. Wang, Q. Zhang, Z. Liu, E. Zhang, Q. Liu, X. Yu, B. Lu, *Adv. Energy Mater.* **2018**, *8*, 1801477.
- [20]W. Wang, B. Jiang, C. Qian, F. Lv, J. Feng, J. Zhou, K. Wang, C. Yang, Y. Yang, S. Guo, *Adv. Mater.* **2018**, *30*, 1801812.
